# 1 Isolation disrupts social interactions and destabilizes brain development in bumblebees

2

3 Z Yan Wang<sup>1,2\*</sup>, Grace C. McKenzie-Smith<sup>2-3\*</sup>, Weijie Liu<sup>1</sup>, Hyo Jin Cho<sup>1</sup>, Talmo Pereira<sup>4</sup>,  
4 Zahra Dhanerawala<sup>4,5</sup>, Joshua W. Shaevitz<sup>2-3</sup>, Sarah D. Kocher<sup>1,2</sup>

5

6 <sup>1</sup>Department of Ecology and Evolutionary Biology, Princeton University, Princeton, NJ

7 <sup>2</sup>Lewis Sigler Institute of Integrative Genomics, Princeton University, Princeton, NJ

8 <sup>3</sup>Department of Physics, Princeton University, Princeton, NJ

9 <sup>4</sup>Princeton Neuroscience Institute, Princeton University, Princeton, NJ

10 <sup>5</sup>Department of Neuroscience, Washington University School of Medicine, St. Louis, MO, USA

## 11 Summary

12 Social isolation, particularly in early life, leads to deleterious physiological and  
13 behavioral outcomes. Few studies, if any, have been able to capture the behavioral and  
14 neurogenomic consequences of early life social isolation together in a single social animal  
15 system. Here, we leverage new high-throughput tools to comprehensively investigate the impact  
16 of isolation in the bumblebee (*Bombus impatiens*) from behavioral, molecular, and  
17 neuroanatomical perspectives. We reared newly emerged bumblebees either in complete  
18 isolation, small groups, or in their natal colony, and then analyzed their behaviors while alone or  
19 paired with another bee. We find that when alone, individuals of each rearing condition show  
20 distinct behavioral signatures. When paired with a conspecific, bees reared in small groups or in  
21 the natal colony express similar behavioral profiles. Isolated bees, however, showed increased  
22 social interactions. To identify the neurobiological correlates of these differences, we quantified  
23 brain gene expression and measured the volumes of key brain regions for a subset of individuals  
24 from each rearing condition. Overall, we find that isolation increases social interactions and  
25 disrupts gene expression and brain development. Limited social experience in small groups is  
26 sufficient to preserve typical patterns of brain development and social behavior.

## 27 Results and Discussion

28 Social animals rely on interactions with conspecifics to survive. Isolation from the social  
29 group leads to detrimental impacts on physical health, fitness, and even longevity<sup>1-6</sup>. The effects  
30 of social isolation are even more profound during sensitive developmental periods, such as in  
31 early life, when social experiences may strongly influence an individual's "social competence",  
32 the ability to adapt behavior according to changes in social context<sup>7-9</sup>. This can lead to poorer  
33 developmental or fitness outcomes<sup>10</sup>. For example, increased aggression across social contexts is  
34 a common consequence of social isolation in mice<sup>11,12</sup>, fish<sup>8,13</sup>, flies<sup>14-16</sup>, and crickets<sup>17,18</sup>.

35 The early life environment may also impact social competence in the social insects, who  
36 live collectively in colonies ranging from a few individuals to millions<sup>19</sup>. A growing body of  
37 research shows that social isolation impacts the behavior and physiology of bees<sup>20-22</sup>,

38 ants<sup>1,2,4,23,24</sup>, and wasps<sup>25–27</sup>. Few studies have been able to capture behavioral and neurogenomic  
 39 consequences of early life social isolation in a single social animal system. Here, we investigate  
 40 the impacts of social isolation in the bumblebee (*Bombus impatiens*) on individual and social  
 41 behavior, gene expression, and neuroanatomy.

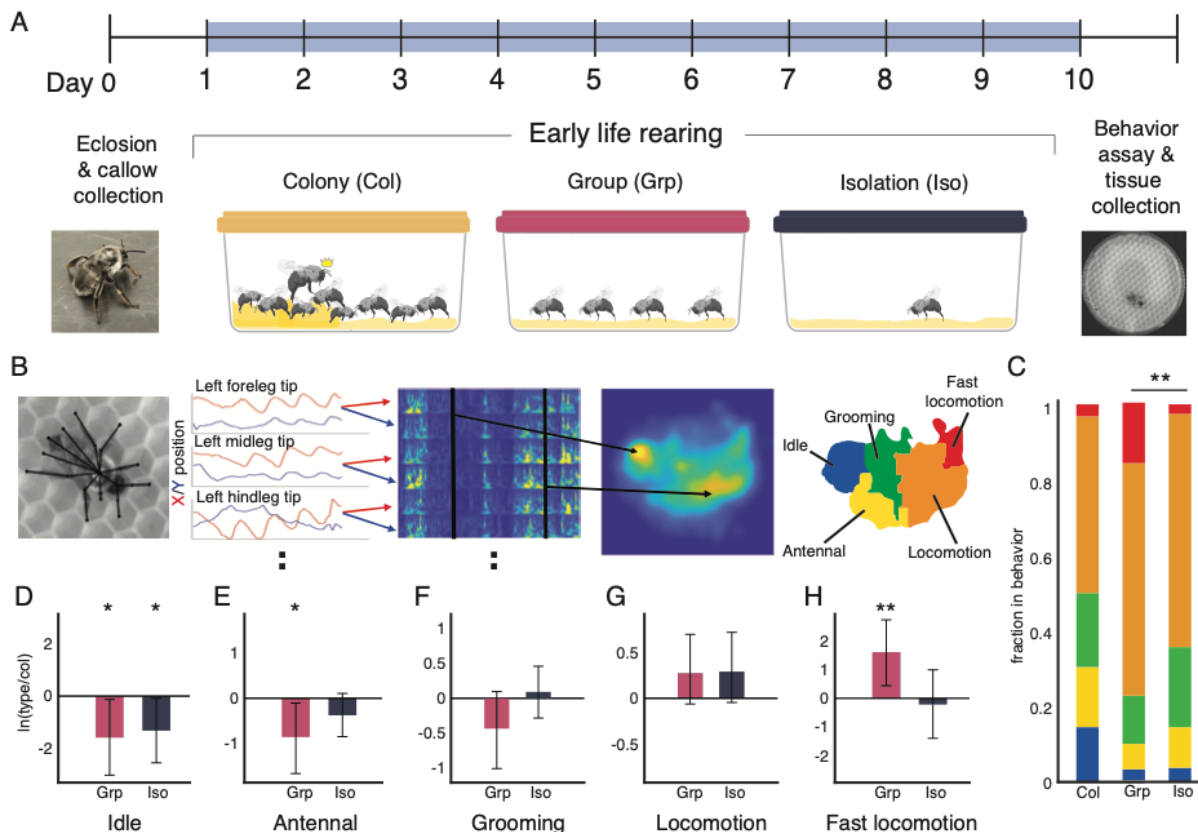

### Figure 1. Early life rearing condition alters adult behavior in the bumblebee

**A.** Experimental overview. Newly emerged callows, identified by their silver-white pigmentation and slow, sluggish gait, were assigned to one of three treatment conditions: colony (col) in which the individual is returned to her natal colony; group (grp), in which four nestmates are co-housed outside of the colony; and isolation (iso), in which a single bee is housed in complete social isolation. Bees were housed in these treatment conditions for 9 consecutive days. On post-eclosion day 10, bees were collected for behavioral and neurobiological assays. **B.** Behavioral assay and embedding. Freely-behaving bees were recorded from above for 30 minutes under IR illumination. Bees were assayed in either solo or paired contexts. SLEAP was used to track body parts and bee identity over the duration of the behavioral assay (black overlay). The spectrograms of body part time traces were embedded into a two-dimensional space using t-SNE. Regions of high density were clustered using a watershed transform, then grouped together according to their common behavior motifs into a behavior map of 5 discrete behaviors: idle, antennal behaviors, grooming, locomotion, and fast locomotion. For full details, see Methods. **C.** Time use compositions. Isolated and group-reared bees differ significantly in their time usage compositions (nonparametric multivariate test on ilr transformed fractions, Wilks' Lambda type statistic. \*\* indicates  $p < 0.01$ ). **D-H.** Compositional analysis of discrete behaviors. There are significant differences across solo bees in the idle, antennal, and fast locomotion behaviors as quantified by the log ratio differences between geometric means of iso or grp bees vs. col bees (error bars are bootstrapped 95% confidence intervals). Differences are considered significant in the bootstrapped 95% confidence intervals do not overlap 0. \* $p < 0.05$ , \*\* $p < 0.01$ .

42 Bumblebees live in social colonies consisting of about 100-200 female workers and a  
 43 single queen<sup>28</sup>. Within the colony, individuals display consistent differences in behavior that are  
 44 stable over time and context. These behavioral repertoires are established in the first 1-2 weeks  
 45 of adulthood through pairwise and spatial interactions among individuals<sup>29–32</sup>. During this same  
 46 period in early adulthood, the bumblebee brain is rapidly developing<sup>33</sup>. To determine if and how

47 social isolation impacts social behaviors in this species, we experimentally altered the social  
48 environments of workers during this early life developmental period, and we assayed individual  
49 bee behavior either alone or paired with a social partner.

50 To alter the early life social experiences of bumblebees, we developed a modular housing  
51 chamber to isolate residents from external auditory, visual, and odor cues (Methods, Figure 1A).  
52 We collected newly-eclosed callow females, recognizable by their silvery appearance and  
53 sluggish behavior in the colony<sup>28</sup>, and split them amongst 3 different early life treatment  
54 conditions: isolation (Iso, n = 96 for behavior, n = 16 for RNA sequencing, n = 20 for imaging),  
55 in which a single bee is housed in complete social isolation; group-housed (Grp, n = 113 for  
56 behavior, n = 15 for RNA sequencing, n = 24 for imaging), in which four nestmates are co-  
57 housed outside the colony; and colony-housed (Col, n = 99 for behavior, n = 9 for RNA  
58 sequencing, n = 22 for imaging), in which the individual is immediately returned to her natal  
59 colony (Figure 1A). Bees were kept in their treatment condition for 9 consecutive days, thus  
60 isolated bees were reared completely devoid of social experiences and group- and colony-housed  
61 bees experienced varying amounts of socialization. On post-eclosion day 10, behavioral assays  
62 were performed and tissues were collected for downstream analysis. 306 bees were included in  
63 the behavioral trial assays, 40 bees in the transcriptomic analyses, and 66 bees in the volumetric  
64 analyses (see Methods for details). Different sets of individuals were used for each downstream  
65 analysis (behavior, brain gene expression, brain morphology), precluding analyses that combined  
66 multiple datasets.

67 We captured the behavior of experimental bees by themselves (“solo”) and with another  
68 bee (“paired”) by recording their free behavior in a 10-cm petri dish for 30 min under infrared  
69 illumination, which bees cannot see<sup>34</sup>. For paired conditions, we assayed same-treatment pairs  
70 (Iso+Iso, Grp+Grp, Col+Col) as well as each possible combination (Iso+Grp, Iso+Col, Grp+Col,  
71 and Grp bees from separate groups) (Figure S1-2). To quantify the behavior of the bees, we used  
72 the MotionMapper technique<sup>35</sup>. We first used the SLEAP<sup>36</sup> pose tracking software to identify  
73 body parts in each frame (Figure 1B, Video S1), and then performed a continuous wavelet  
74 transform on the body part position time series. The concatenated spectral densities were then  
75 embedded into two dimensions using t-distributed stochastic neighbor embedding (t-SNE), and a  
76 probability density function of time spent at each location of the t-SNE space revealed peaks  
77 corresponding to commonly repeated body part dynamics (Figure 1B, Figure S1, see Methods  
78 for details). We segmented the embedded space via a watershed transform to separate regions of  
79 stereotyped limb dynamics. We assigned each region to one of five discrete behavior states based  
80 on corresponding video clips: idle (no movement), antennal movement, grooming, locomotion,  
81 and a fast locomotion behavior mostly seen in solo trials of group-reared bees (Figure 1, Figure  
82 S1, Video S2). This enabled us to define discrete behavior composition profiles for each bee and  
83 pinpoint behavioral biases in each treatment group. These analyses reveal that colony-reared  
84 bees spend more time in an idle state than group-reared or isolated bees, and group-reared bees  
85 spend much more time in fast locomotion than colony-reared or isolated bees (Figure 1C). These

86 data are supported by quantification of the bees' instantaneous speeds over the course of the  
87 behavior assay (Figure S1E).

88 We then used principles from compositional data analysis to quantify differences in the  
89 behavioral profiles of each treatment group in the absence of a social partner<sup>37</sup>. We carried out an  
90 isometric log-ratio (ilr) transform on the fraction of time spent in each behavioral state to express  
91 the data in terms of four independent components. We then performed a non-parametric  
92 multivariate analysis on the ilr components. This analysis reveals a significant difference  
93 between the overall behavioral profiles of the isolated and group-reared bees when alone (Wilks'  
94 Lambda type statistic,  $p < 0.01$ , Figure 1C). To examine if and how behaviors differ between the  
95 colony-reared (control) and group-reared or isolated bees, we calculated the log-ratio of the  
96 geometric means for each behavioral state across individuals. We find that isolated and group-  
97 reared bees spend less time in an idle state than colony-reared bees do, and that group-reared  
98 bees spend more time in fast locomotion and less time on antennal behaviors (a primary mode of  
99 communication in bees)<sup>28</sup> compared to colony-reared bees (Figure 1D-H; see Methods for  
100 details). These data highlight the impact of early life environments on individual behavior: in  
101 solo contexts, bees from all three treatment groups diverge in behavior in unique ways.

102 Next, we examined the differences in behavior among treatment groups in the presence of  
103 a social partner because pairwise interactions are considered the building blocks of group  
104 behavioral dynamics<sup>38</sup>. We first quantified how often paired bees were in close proximity by  
105 examining the differences of inter-thorax distance distributions compared to random chance (see  
106 Methods) (Figure 2A). For clarity, we present the results of only the same-treatment pairs, but all  
107 pairwise comparisons are presented in the Supplement (Figure S2). We found all pairings to be  
108 enriched for inter-thorax distances less than 2 cm. To determine whether distance from a social  
109 partner impacts a bee's overall behavioral repertoire, we quantified changes in the behaviors of  
110 paired bees depending on their distance from a social partner using the Jensen-Shannon  
111 divergences between 0.2 cm-binned limb dynamics (i.e. the average t-SNE embedded spaces of  
112 bees) and the limb dynamics at 8 cm (see Methods)<sup>39</sup>. We find that, across all pairing types,  
113 behavior changes strongly when the bees are less than 2 cm (roughly two body-lengths) apart but  
114 that the bees' behavior is largely unaffected by the partner at larger distances (Figure 2B). Based  
115 on these results, we defined bees to be affiliated when their inter-thorax distance is less than 2-  
116 cm and unaffiliated when they are farther apart. This is concordant with previous studies  
117 defining social interactions in a similar range<sup>32</sup>. Surprisingly, we found that pairs of isolated bees  
118 spent the most time affiliated with social partners across all pairings.

119 We then compared the behavioral profiles of bees when affiliated versus unaffiliated  
120 (Figure 2C). Affiliation has the broadest impact on the behaviors of isolated bees: isolated bees  
121 locomote less and engage in more idle and antennal behaviors when they are close to a social  
122 partner. In contrast, only grooming is statistically affected by affiliation in the group- and  
123 colony-reared bees, where it is increased during affiliation (Figure 2C). Comparing across  
124 rearing conditions, we find that affiliation has a statistically different effect on the antennal,  
125 locomotive, and fast locomotive behaviors of isolated bees compared to colony-reared bees, and



126 on fast locomotive behavior of isolated bees compared to group-reared bees. There is no such  
 127 difference between the group- and colony-reared bees (Figure 2D). Taken together, our results  
 128 reveal that isolated bees not only spend more time close to their social partners, but their  
 129 behaviors are also more strongly impacted by partner proximity than any other rearing condition.  
 130

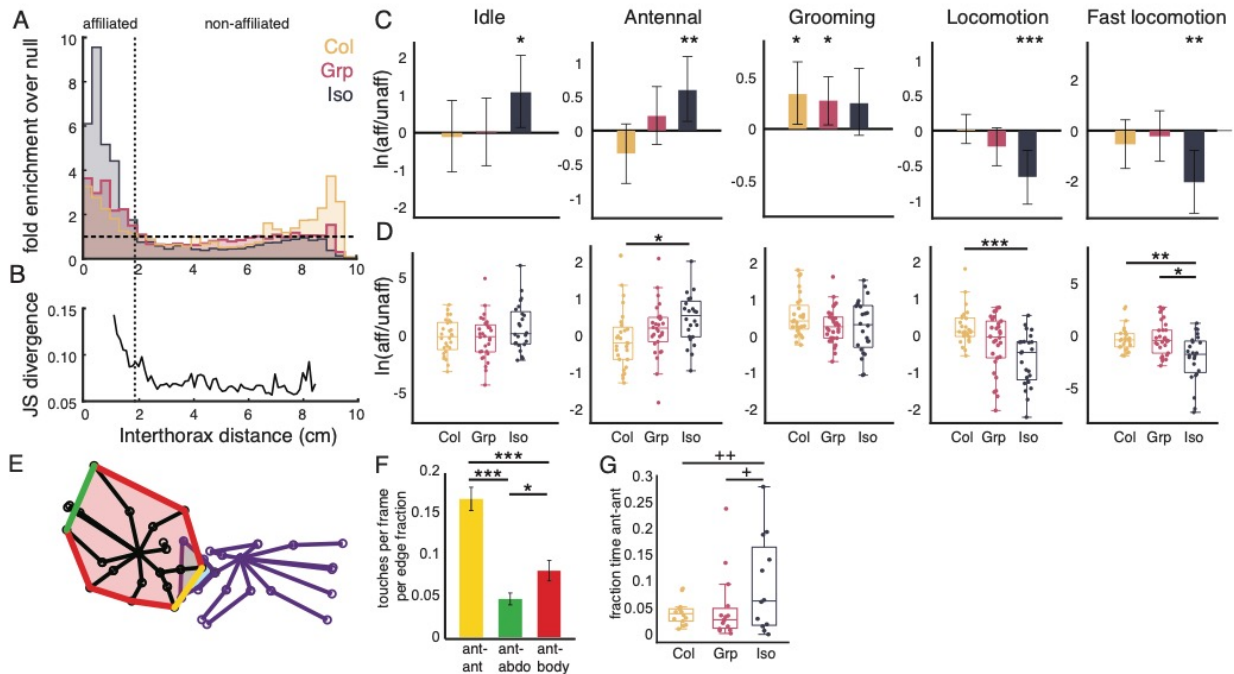

### Figure 2. Isolated bumblebees display altered social interactions

**A.** Bees are considered to be affiliated at interthorax distances of 2cm or less (within the vertical dotted line). Pairs of isolated, group-, and colony-reared bees are enriched within this distance compared to the null (occupancy above horizontal dashed line, which indicates expected level for randomly arranged bees). **B.** The difference in overall behavior map calculated at each interthorax distance and then compared to a 'far' distance of 8cm using Jensen-Shannon divergence indicates a difference in behavior that drops off after 2cm. **C.** Isolated bees spend significantly more time in the idle and antennal states, and less time in the locomotion and fast locomotion states when affiliated, as indicated by the log ratio of the geometric means of time spent in each behavior. Differences are considered significant in the bootstrapped 95% confidence intervals do not overlap 0. \* $p < 0.05$ , \*\* $p < 0.01$ , \*\*\* $p < 0.001$ . **D.** Distribution of changes in occupancy of discrete behavior components in affiliated vs unaffiliated states. Pairs of isolated bees differ from pairs of colony bees in the change in occupancy of the antennal state when affiliated, and differ from both pairs of colony bees and pairs of grouped bees in the change in occupancy of the locomotion and fast locomotion states when affiliated (Kruskal-Wallis test, Wilcoxon rank sum for pairwise comparisons with Bonferroni correction, \* $p < 0.05$ , \*\* $p < 0.01$ , \*\*\* $p < 0.001$ ). **E.** Antennal (yellow), abdominal (green), and body (red) edges define where antennation occurs. **F.** Pairs of colony bees engage in more antennae-to-antennae touches per available edge space compared to antennae-to-abdomen or antennae-to-body touches (Kruskal-Wallis test, Wilcoxon rank sum for pairwise comparisons with Bonferroni correction, \* $p < 0.05$ , \*\* $p < 0.01$ , \*\*\* $p < 0.001$ ). **G.** Pairs of isolated bees have significantly more variance in the amount of time they spend antennae-to-antennae than group- or colony-reared bees (nonparametric Fligner-Killeen test with Bonferroni correction, + $p < 0.05$ , ++ $p < 0.01$ ).

131 Finally, we characterized the differences in antennation behaviors across the rearing  
 132 conditions (Figure 2E-G). Affiliation and other modes of social cooperation often rely on the  
 133 ability to discriminate between nestmates and non-nestmates. Bumblebees and other social  
 134 insects primarily do this with chemical signals they detect via chemosensory receptors on their  
 135 antennae<sup>40,41</sup>. The chemical composition of these signals can vary across body parts<sup>42,43</sup>, so  
 136 where the antennae make contact may indicate targeting a particular subset of odorants over  
 137 others. To determine which mode of antennation has the most relevance in this context, in the  
 138 colony-reared (control) bees, we normalized antennal touches to the antennal, rear abdominal,  
 139 and body zones of the partner bee to account for differences in the size of each zone (Figure 2E).

140 We find that pairs of colony-reared bees have significantly more antennae-to-antennae touches  
141 than antennae-to-abdomen or antennae-to-body (Figure 2F), demonstrating that antennae-to-  
142 antennae touching is a favored mode of contact over what is expected by random chance. We  
143 then compared antennae-to-antennae touches across all rearing conditions, and find that all bees  
144 spent comparable fractions of time engaging in antennae-to-antennae touching (Figure 2G).  
145 However, isolated bees showed significantly higher variance in their propensity for antennae-to-  
146 antennae touching compared to colony- and group-reared bees, suggesting that this behavior may  
147 be modulated by early life social experience.

148 Together, the results from our behavioral assays demonstrate that the early life social  
149 environment induces changes in key social behavioral features later in life. Both isolated and  
150 group-reared bees showed perturbed behavioral profiles in solo assays compared to colony-  
151 reared bees. However, in paired assays, isolated bees have broad and significant changes to their  
152 behavior when affiliated with a partner bee. In contrast, the behaviors of both group- and colony-  
153 reared bees are largely unaffected by proximity to a social partner. Isolated bees also show a  
154 large variance in the amount of time they spend in antennae-to-antennae contact with a partner  
155 bee, while group- and colony-reared bees are more uniform. This suggests that, while the extra-  
156 hive environment of the group-rearing condition alters the behavior of bees when they are alone,  
157 only the isolated bees have perturbed behavior in the presence of a social partner.

158 The behavioral differences we identified between isolated and group-reared bees suggests  
159 that there may be underlying neurobiological differences between these experimental groups. To  
160 better understand the molecular underpinnings of these behavioral changes, we performed whole  
161 brain transcriptome sequencing on a subset of treatment bees (isolated,  $n=16$ ; group,  $n=15$ ;  
162 colony,  $n=9$ ) using TM3' seq, a tagmentation-based 3'-enriched RNA sequencing approach<sup>44</sup>. We  
163 first performed an analysis of differentially expressed genes (DEGs) across treatment groups,  
164 blocking for natal colony (Figure 3A, see Methods).

165 In pairwise comparisons, brain transcriptomes of isolated bees showed distinct  
166 differences from those of group- and colony-reared bees. We found strong differences in brain  
167 gene expression between isolated and colony-reared bees (94 DEGs,  $FDR < 0.05$ ) and modest  
168 differences between isolated and group-housed bees (27 DEGs,  $FDR < 0.05$ ) (Figure 3A, see  
169 Table S1 for full list of genes). Overall, most DEGs showed decreased expression in isolated  
170 bees as compared to either of the other two rearing conditions (Table S1). Surprisingly, no DEGs  
171 were identified between group and colony-reared bees (Figure 3A). A GOterm enrichment  
172 analysis demonstrates that social isolation impacts molecular systems important to social  
173 communication, including steroid biosynthesis and signaling processes (Table S2). Overall, our  
174 transcriptomic data shows that, much like the changes we observed in behavior, complete social

175 isolation induces significant changes in the expression of key neuromolecular systems important  
 176 for social living while group-rearing does not significantly alter whole-brain gene expression.

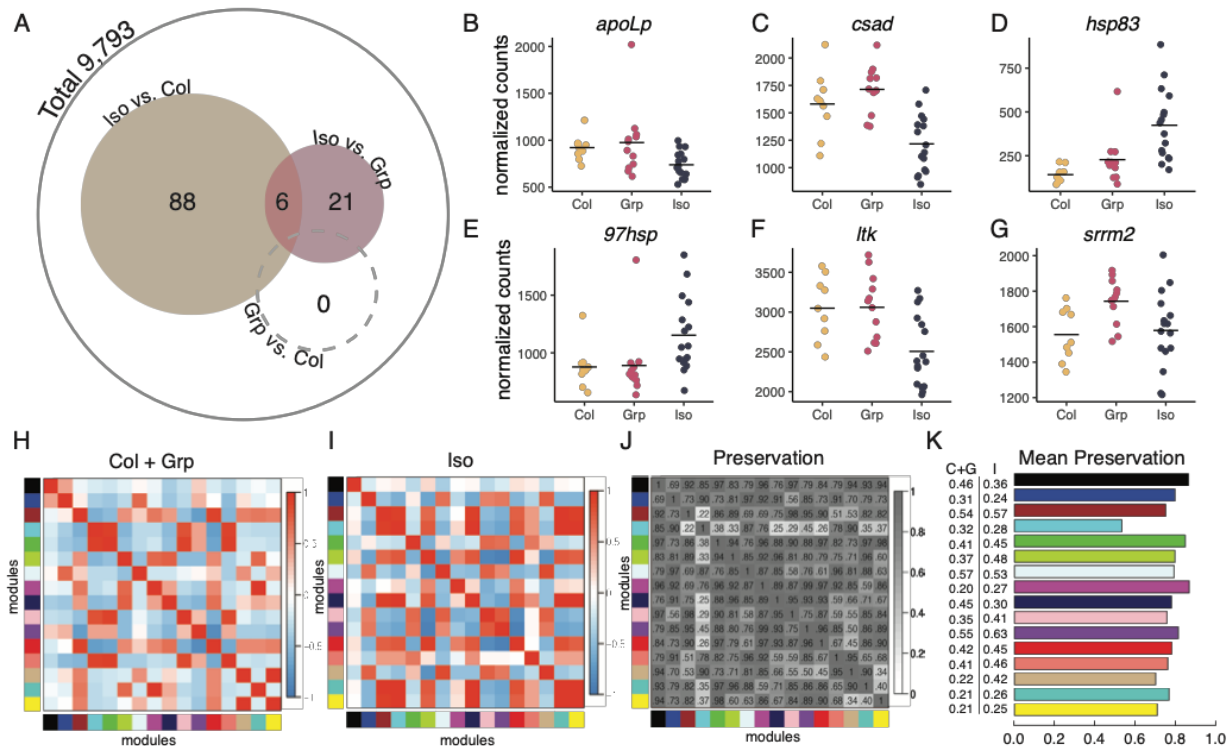

**Figure 3. Social isolation disrupts bumblebee neurogenomic landscape**

**A.** Differential gene expression analysis. The expression of 94 genes was significantly different between isolated and colony-reared bees. The expression of 27 genes was significantly different between isolated and group-reared bees. Venn diagram shows 6 genes that overlap between these two sets. No genes were differentially expressed between group- and colony-reared bees. **B-G.** Normalized counts of 6 genes in the overlapping region. *apoLp*: apolipoporphins, *csad*: cysteine sulfonic acid decarboxylase; *hsp83*: heat shock protein 83; *97hsp*: 97kDa heat shock protein; *Itk*: leukocyte tyrosine kinase receptor; *srrm2*: serine/arginine repetitive matrix protein 2. **H.** Eigengene network headmaps for colony- and group-reared bees. See Methods for details. **I.** Eigengene network heatmaps for isolated bees. See Methods for details. For full module membership, see Table S3. **J.** Heatmap showing preservation between the two networks (1-absolute difference of the two eigengene networks). Darker cells indicate stronger preservation. **K.** Inter- and Intra- module relationships. Barplot showing mean preservation of relationships for each eigengene between colony- and group-reared and isolated bees (inter-module relationships). Numbers indicate mean intra-module correlation within the colony- and group-reared (C+G) and isolated (I) data sets.

177 In addition, two genes that are common to the set of isolated vs. group-reared DEGs and  
 178 the set of isolated vs. colony-reared DEGs (Figure 3B-G) participate in the signaling of juvenile  
 179 hormone (JH): *apolipoporphins* (*apoLp*, Figure 3B) and *heat shock protein 83* (*hsp83*, Figure 3D).  
 180 In social insects, JH signaling serves as a crucial regulator of reproductive differentiation and  
 181 social behavior<sup>45-50</sup>. ApoLp and hsp83 are among the suite of proteins that orchestrate the  
 182 transport of JH to its sites of utilization and initiate its downstream effects<sup>48,51</sup>. In addition, heat  
 183 shock proteins have previously been identified as key conserved members of the neurogenomic  
 184 response to social challenge in the honey bee, mouse, and stickleback<sup>52</sup>. The differential  
 185 expression of both *apoLp*, *hsp83*, and *97hsp* in our transcriptomic data sets strongly suggests that  
 186 social isolation disrupts signaling of JH in bumblebees, highlighting the importance of this  
 187 pathway in regulating social behaviors across insects<sup>53</sup>.

188 Whereas differential gene expression considers each gene individually, network analysis  
 189 provides insight on the global network properties of the transcriptome. To better understand the

190 gene expression differences across treatment groups, we investigated the gene network dynamics  
191 using weighted gene co-expression network analysis (WGCNA<sup>54</sup>). Because there was no  
192 evidence for significant differences in gene expression between the colony- and group-reared  
193 bees, we combined RNA sequencing data from both groups into a single set for this analysis. We  
194 constructed global co-expression networks using data from isolated bees and the combined set of  
195 group and colony-reared bee data, then identified modules of genes with linked co-expression  
196 (Figure S3, Methods).

197 To establish concordance and divergence in the network organization between isolated  
198 and socially-experienced bees, 16 consensus modules were derived from the weighted average of  
199 the two correlation matrices from each behavioral background (Figure 3, Figure S3, Table S3,  
200 Methods). We then examined the correlation matrices amongst all gene modules in the isolated  
201 and socially-experienced bees (inter-module connectivity, Figure 3H-K). This reveals  
202 dysregulation of isolated bee transcriptomes at the module level: genes in the light blue module,  
203 for example, show low preservation (negative correlation) in its adjacency relationships to other  
204 modules in isolated (I) compared to the colony- and group-reared (C + G) bees (Figure 3J, Table  
205 S3). In this module, the mean correlation in colony- and group-reared bees is 0.32, while the  
206 mean correlation in isolated bees is 0.28 (Figure 3K). Within all modules, genes in modules from  
207 the isolated bee data set tended to show higher connectivity than those in the colony- and group-  
208 reared data set (Figure 3K). Interestingly, stronger inter-module connectivity is also a feature of  
209 neuronal gene networks in mouse models of autism spectrum disorder<sup>55-57</sup>. Together, our data  
210 reveal that social isolation leads to both intra- and inter-module dysregulation of the brain  
211 transcriptome (Figure 3H-K).

212 Given the influence of isolation on brain gene expression, we next interrogated whether  
213 social isolation causes broad changes in brain development. The early developmental period in  
214 bumblebees is marked by changes in neuropil volume, which reach an adult state around 9 days  
215 after eclosion<sup>33</sup>. This maturation process is likely influenced by diverse processes such as  
216 learning, endogenous hormone signaling, and experience, including social experiences<sup>58-60</sup>. To  
217 determine how the social rearing environment may impact the development of the bumblebee  
218 brain, we created an annotated brain template using the full confocal imaging stack of a  
219 representative worker bee brain (Figure 4A-B, Video S3). Individual confocal stacks of  
220 experimental bees (isolated n=20, group-reared n=24, colony-reared n=22; step size 2.542  $\mu$ m)  
221 were fitted to this template for volumetric analysis, and voxels to neuropil regions of interest  
222 were summed. To account for individual variation in brain size, we divided the voxels in  
223 neuropils of interest by all measured voxels in the brain sample to derive a volume fraction for  
224 each bee (Figure 4C-F).

225 We find that, while the mean volume fractions of all brain regions were similar across  
226 treatment conditions, the variances of the volume fractions were significantly different (Figure  
227 4C-F). For all neuropil regions, inter-individual variance is low amongst colony- and group-  
228 reared bees, indicating homogeneity across individuals, but this variance is high in isolated bees  
229 (Figure 4C-F). The concordance between the brains of group- and colony-reared bees, and the



230 increased variation in the brains of isolated bees, strongly implies that the social environment  
 231 acts as a powerful buffering force on the development of the bumblebee. In the complete absence  
 232 of social cues, the brain may become vulnerable to decanalization, defined as deviations from an  
 233 optimized phenotype<sup>61–63</sup>. In other words, it appears that social isolation destabilizes and  
 234 stochastically changes the developmental trajectory of the brain, leading to the greater variation  
 235 in neuropil volumes observed. This increased variation may be mediated by changes in gene  
 236 expression or gene network relationships.

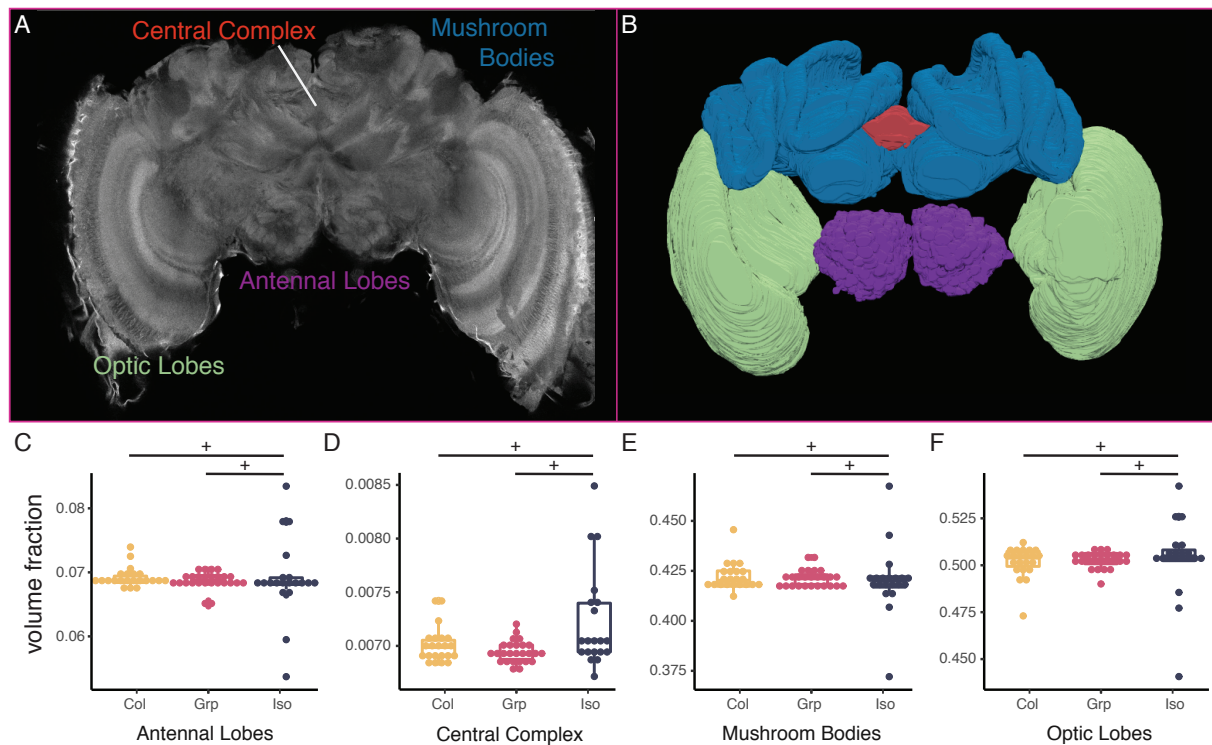

**Figure 4. Social isolation destabilizes development of the bumblebee brain**

**A.** Confocal slice from the median volume brain used to generate volumetric bumblebee brain atlas. Neuropil label colors correspond to segmented regions in **B**. For full annotation, see Video S3 and Data Availability. **B.** Segmented volumetric brain atlas. Antennal lobes: purple; Central complex: red; Mushroom bodies: blue; Optic lobes: green. **C-F.** Neuropil volume fractions (raw voxels in area of region/ total voxels). In all regions, the variance was significantly different between the brains of isolated bees and that of group- and colony-reared bees (Fligner-Killeen test, + indicates  $p$  value  $< 0.05$ ).

237 Taken together, our results demonstrate that the early life social environment shapes adult  
 238 behavior in bumblebees, and that these effects are most prominent in social contexts. While all  
 239 three cohorts had different behavioral repertoires in solo assays, the presence of a social partner  
 240 led to unique behavioral responses in isolated bees that neither group- nor colony-reared bees  
 241 exhibited. Isolated bees also demonstrated greater inter-individual variance in behavior  
 242 (antennae-to-antennae contact) and physiology (neuropil volumes) than bees with any degree of  
 243 social experience. These differences may be a signature of reduced social competency similar to  
 244 those described in vertebrates<sup>7–9</sup>. Whether these behavioral changes are due to perturbations in  
 245 the ability to detect social cues, process the salience of relevant cues, or produce appropriate cues  
 246 remains unknown. Our study lays the foundation for future research that directly assesses these  
 247 potential causes as well as the costs of social isolation.

## 248 **Acknowledgements**

249 We are thankful to Andrew Webb and Nathaniel Tabris for analytical assistance; Thomas Pisano,  
250 Sam Wang, and Gary Laevsky for imaging assistance; Elena Filippova and the Ayroles Lab for  
251 reagents; the McBride lab for use of equipment; John Stowers (Loopbio) for technical assistance;  
252 and Ian Traniello, Beryl Jones, Sama Ahmed, Dee Ruttenberg, and James Crall for improving the  
253 manuscript. J.W.S. acknowledges funding from NIH R01 NS10489 and S.D.K. from NIH  
254 1DP2GM137424-01. In addition, this work was supported by NIH U19 NS104648, the Princeton  
255 Catalysis Initiative, and the Lewis-Sigler Institute for Integrative Genomics, and in part by the  
256 National Science Foundation, through the Center for the Physics of Biological Function (PHY-  
257 1734030).

## 258 **Author Contributions**

259 Conceptualization, Z.Y.W., J.W.S., and S.D.K.; Methodology, Z.Y.W., G.C.M-S., T.P., J.W.S.,  
260 and S.D.K.; Investigation, Z.Y.W., G.C.M-S., W.L., H.J.C., T.P., Z.D.; Formal Analysis,  
261 Z.Y.W., G.C.M-S.; Resources, J.W.S. and S.D.K.; Writing—Original Draft, Z.Y.W.; Writing—  
262 Review & Editing, Z.Y.W., G.C.M-S., J.W.S., S.D.K.; Visualization, Z.Y.W.; Supervision,  
263 Z.Y.W., G.C.M-S., J.W.S., S.D.K.; Funding Acquisition, J.W.S. and S.D.K.

## 264 **Data Availability**

265 All transcriptomic data is deposited in the NCBI SRA database under BioProject ID  
266 PRJNA787650. Brain segmentation data is available at  
267 <https://github.com/kocherlab/BumblebeeIsolation>.

## 268 **Declaration of Interests**

269 The authors declare no competing interests.

270

## 271 **Main Text Figure Legends**

### 272 **Figure 1. Early life rearing condition alters adult behavior in the bumblebee**

273 **A.** Experimental overview. Newly emerged callows, identified by their silver-white pigmentation  
274 and slow, sluggish gait, were assigned to one of three treatment conditions: colony (col) in which  
275 the individual is returned to her natal colony; group (grp), in which four nestmates are co-housed  
276 outside of the colony; and isolation (iso), in which a single bee is housed in complete social  
277 isolation. Bees were housed in these treatment conditions for 9 consecutive days. On post-  
278 eclosion day 10, bees were collected for behavioral and neurobiological assays. **B.** Behavioral  
279 assay and embedding. Freely-behaving bees were recorded from above for 30 minutes under IR  
280 illumination. Bees were assayed in either solo or paired contexts. SLEAP was used to track body  
281 parts and bee identity over the duration of the behavioral assay (black overlay). The  
282 spectrograms of body part time traces were embedded into a two-dimensional space using t-SNE.

283 Regions of high density were clustered using a watershed transform, then grouped together  
284 according to their common behavior motifs into a behavior map of 5 discrete behaviors: idle,  
285 antennal behaviors, grooming, locomotion, and fast locomotion. For full details, see Methods. **C.**  
286 Time use compositions. Isolated and group-reared bees differ significantly in their time usage  
287 compositions (nonparametric multivariate test on  $\ln$  transformed fractions, Wilks' Lambda type  
288 statistic. \*\* indicates  $p < 0.01$ ). **D-H.** Compositional analysis of discrete behaviors. There are  
289 significant differences across solo bees in the idle, antennal, and fast locomotion behaviors as  
290 quantified by the log ratio differences between geometric means of iso or grp bees vs. col bees  
291 (error bars are bootstrapped 95% confidence intervals). Differences are considered significant in  
292 the bootstrapped 95% confidence intervals do not overlap 0. \* $p < 0.05$ , \*\* $p < 0.01$ .

293

## 294 **Figure 2. Isolated bumblebees display altered social interactions**

295 **A.** Bees are considered to be affiliated at inter-thorax distances of 2cm or less (within the vertical  
296 dotted line). Pairs of isolated, group-, and colony-reared bees are enriched within this distance  
297 compared to the null (occupancy above horizontal dashed line, which indicates expected level for  
298 randomly arranged bees). **B.** The difference in overall behavior map calculated at each inter-  
299 thorax distance and then compared to a 'far' distance of 8cm using Jensen-Shannon divergence  
300 indicates a difference in behavior that drops off after 2cm. **C.** Isolated bees spend significantly  
301 more time in the idle and antennal states, and less time in the locomotion and fast locomotion  
302 states when affiliated, as indicated by the log ratio of the geometric means of time spent in each  
303 behavior. Differences are considered significant in the bootstrapped 95% confidence intervals do  
304 not overlap 0. \* $p < 0.05$ , \*\* $p < 0.01$ , \*\*\* $p < 0.001$ . **D.** Pairs of isolated bees differ from pairs of  
305 colony bees in the change in occupancy of the antennal state when affiliated, and differ from  
306 both pairs of colony bees and pairs of grouped bees in the change in occupancy of the  
307 locomotion and fast locomotion states when affiliated (Kruskal-Wallis test, Wilcoxon rank sum  
308 for pairwise comparisons with Bonferroni correction, \* $p < 0.05$ , \*\* $p < 0.01$ , \*\*\* $p < 0.001$ ). **E.**  
309 Antennal (yellow), abdominal (green), and body (red) edges define where antennation occurs. **F.**  
310 Pairs of colony bees engage in more antennae-to-antennae touches per available edge space  
311 compared to antennae-to-abdomen or antennae-to-body touches (Kruskal-Wallis test, Wilcoxon  
312 rank sum for pairwise comparisons with Bonferroni correction, \* $p < 0.05$ , \*\* $p < 0.01$ ,  
313 \*\*\* $p < 0.001$ ). **G.** Pairs of isolated bees have significantly more variance in the amount of time  
314 they spend antennae-to-antennae than group- or colony-reared bees (nonparametric Fligner-  
315 Killeen test with Bonferroni correction, + $p < 0.05$ , ++ $p < 0.01$ ).

## 316 **Figure 3. Social isolation disrupts bumblebee neurogenomic landscape**

317 **A.** Differential gene expression analysis. The expression of 94 genes was significantly different  
318 between isolated and colony-reared bees. The expression of 27 genes was significantly different  
319 between isolated and group-reared bees. Venn diagram shows 6 genes that overlap between these  
320 two sets. No genes were differentially expressed between group- and colony-reared bees. **B-G.**  
321 Normalized counts of 6 genes in the overlapping region. *apoLp*: apolipoporphins, *csad*: cysteine

322 sulfenic acid decarboxylase; *hsp83*: heat shock protein 83; *97hsp*: 97kDa heat shock protein; *ltk*:  
323 leukocyte tyrosine kinase receptor; *srrm2*: serine/arginine repetitive matrix protein 2. **H.**  
324 Eigengene network headmaps for colony- and group-reared bees. See Methods for details. **I.**  
325 Eigengene network heatmaps for isolated bees. See Methods for details. For full module  
326 membership, see Table S3. **J.** Heatmap showing preservation between the two networks (1-  
327 absolute difference of the two eigengene networks). Darker cells indicate stronger preservation.  
328 **K.** Inter- and Intra- module relationships. Barplot showing mean preservation of relationships for  
329 each eigengene between colony- and group-reared and isolated bees (inter-module relationships).  
330 Numbers indicate mean intra-module correlation within the colony- and group- reared (C+G) and  
331 isolated (I) data sets.

### 332 **Figure 4. Social isolation destabilizes development of the bumblebee brain**

333 **A.** Confocal slice from the median volume brain used to generate volumetric bumblebee brain  
334 atlas. Neuropil label colors correspond to segmented regions in B. For full annotation, see Video  
335 S3 and Data Availability. **B.** Segmented volumetric brain atlas. Antennal lobes: purple; Central  
336 complex: red; Mushroom bodies: blue; Optic lobes: green. **C-F.** Neuropil volume fractions (raw  
337 voxels in area of region/ total voxels). In all regions, the variance was significantly different  
338 between the brains of isolated bees and that of group- and colony-reared bees (Fligner-Killeen  
339 test, + indicates p value < 0.05).

## 340 **Materials and Methods**

### 341 **Animals**

342 Commercial colonies of common eastern bumblebees (*Bombus impatiens*, n=7) were purchased  
343 from Koppert Biological Systems (Howell, MI, USA) between June-September 2019. Upon  
344 arrival, colonies were visually inspected for the presence of a queen. If no queen was found, or if  
345 multiple foundresses were present, colonies were excluded from the study. Colonies were  
346 maintained in their original packaging under red light in a room with ambient temperature of  
347 23°C.

### 348 **Callow collection**

349 New callows (n = 414) were collected from colonies every morning between 8:30-10:30am.  
350 Colonies were chilled at 4°C for 30-45 minutes, at which point the bees were inactive enough to  
351 ensure safe removal of callows. Callows were positively identified by their silver-white  
352 pigmentation and slow, sluggish gait<sup>28</sup> (Figure 1A).

### 353 **Rearing conditions**

354 Callows were divided into one of 3 rearing conditions, marked accordingly on the dorsal cuticle  
355 of the thorax with a paint pen (Sanford Uni-paint, SAN63721), then introduced into their new



356 growth chambers or back into their natal colonies. Total duration of rearing for all bees lasted 9  
357 consecutive days. Isolated bees (Iso) were housed in custom-designed plastic Tritan chambers  
358 (7.9 x 5.6 x 3.4 inches) lined with commercial beeswax (UBF10, Betterbee, Greenwich, NY,  
359 USA). Each chamber was supplied with HEPA- and carbon-filtered air to eliminate chemical  
360 cues and was sound-dampened with anti-vibration padding to remove auditory cues. Each  
361 chamber had a feeder (byFormica, B07D5M6F4B) with 40% honey water mixture, which was  
362 replaced every other day. Group-reared bees (Grp) were housed in the same chambers with 3  
363 other age-matched nestmates. Each chamber had 2 honey-water feeders, which were replaced  
364 every other day. Colony-reared bees (Col) were returned to their natal colonies after marking and  
365 left alone for the duration of the 9-day rearing period. Group- and colony-housed individuals  
366 were marked on their dorsal thoraces to enable later visual identification. On the 10<sup>th</sup> day,  
367 colony-reared bees were retrieved for subsequent analyses by chilling their natal colonies at 4°C  
368 for 30-45 min.

### 369 **Behavioral assays**

370 On the 10<sup>th</sup> day post-eclosion, between 09:00-16:30, experimental bees were removed from their  
371 respective rearing chambers and paired with an animal of either the same developmental  
372 background (Iso x Iso, n = 24; Grp x Grp, n = 30; Col x Col, n = 28), a different developmental  
373 background (Iso x Grp, n = 14; Iso x Col, n = 29; Grp x Col, n = 11; Grp A x Grp B, n = 22), or  
374 by themselves (Iso, n = 29; Grp, n = 37; Col, n = 31) in an open Petri dish arena (VWR, 25384-  
375 324) lined with commercial beeswax (UBF10, Betterbee, Greenwich, NY, USA). Bees were  
376 allowed to interact and move freely within the dish for 30 minutes. Recording started within one  
377 minute of introduction to the open arena. Video was captured from above with a Flir Blackfly  
378 camera (BFS-U3-32S4M-C) (100 fps, 2048 x 1536 x 1 frame size) on a custom-built Linux  
379 computer running LoopBio Motif software. Illumination was provided by 2 infrared panels on  
380 the left and right sides of the camera. Each bee was assayed only once. A subset of these bees  
381 was collected for subsequent experiments, including RNA sequencing and imaging (see below).

### 382 **Body part tracking**

383 SLEAP was used to estimate the pose of the bees and track movement throughout the entire  
384 behavioral trial<sup>36</sup>. Twenty-one body parts were labeled to form a skeleton for pose estimation:  
385 head, thorax, abdomen, distal tips of antennae (left antenna 1, right antenna 1), antennal pedicels  
386 (left antenna 2, right antenna 2), distal tips of the first wing pair (left wing, right wing), the  
387 femur-tibia joint of each leg, and the tarsus of each leg (Figure 1B). We labeled 966 frames with  
388 2 bees from a representative sample of 18 behavioral recordings for a total of 1604 instances.  
389 Both bees were always visible, and were often overlapping or partially occluded. Occluded body  
390 parts were not labeled. To infer bee tracks across frames, top-down and centroid networks were  
391 trained within the sleap.ai framework (TD, ResNet50). Training and inferencing were conducted  
392 on a local workstation equipped with an Intel Core i7-5960X CPU, 128 GB DDR4 RAM, NVMe

393 solid state drives and a single NVIDIA Quadro P2000 GPU, or on Princeton University's High-  
394 Performance Computing cluster with nodes equipped with NVIDIA P100 GPUs. Tracks were  
395 proofread custom Kalman filter script. Manual adjustments were made to correct any instances in  
396 which tracks were swapped between bees.

### 397 **Behavior/body posture embedding**

398 To quantify the behavior of the bees, we used the MotionMapper technique<sup>35</sup>. We egocentrized  
399 body part traces generated by SLEAP to the thorax body coordinate and thorax-head axis of each  
400 bee. In order to have an instantaneous representation of postural dynamics, we performed a  
401 continuous wavelet transform on the body part position time series on 25 exponentially spaced  
402 frequencies between 0.5Hz and 10Hz, which we empirically determined to be the relevant range  
403 for these data. The resulting concatenated spectral densities thus contained information on the  
404 power in each of these 25 frequencies for the x and y coordinates of each body part for the length  
405 of every trial, so that the postural dynamics of each bee could be described by a 975 element  
406 vector for every frame of the video.

407 In order to define discrete behaviors, we created a low-dimensional representation of  
408 these vectors to highlight features of interest. We used t-distributed stochastic neighbor  
409 embedding (t-SNE) to embed the concatenated spectral density vectors into a two-dimensional  
410 space. t-SNE has the useful property that local similarities will be preserved, such that spectral  
411 density vectors that are similar to each other will map onto nearby points in this space, while  
412 more global similarities are less important. In order to ensure that we are sampling across all  
413 relevant dynamics - that is, that we include even rarely seen dynamics in the spatial embedding -  
414 we importance sample across our dataset by first generating a t-SNE embedding of all timepoints  
415 for each individual. We then segment this embedding using a watershed transform into 100  
416 different regions, and select points evenly across those regions to contribute to the master t-SNE  
417 embedding containing sample points from every trial. Once the master embedding is generated  
418 from these samples, we re-embed the non-sample points into the resulting space using the  
419 Kullback-Leibler divergence as a distance function. We display the final 2-dimensional 'space'  
420 as the probability density of the embedding.

421 We segmented the embedded space of all trials by performing a watershed transform on a  
422 less smoothed ( $\sigma=0.5$ ) probability density, with values below a reasonable threshold of  
423 probability being ignored, resulting in 38 regions centered around peaks of similar spectral  
424 density vectors. We tested several different smoothings and thresholds and chose the one that  
425 created a reasonable separation of peaks without over splitting the data. We generated video  
426 samples corresponding to each region of various lengths reflecting the varying dwell times of the  
427 trajectory of an individual bee's t-SNE coordinate in each of the regions. By visually inspecting  
428 these videos we found these 38 regions, with the exception of region 24, correspond to 5 major  
429 stereotyped behavior modalities that we define as: idle (no movement), antennal movement,  
430 grooming, locomotion, and a fast locomotion behavior mostly seen in solo trials of group-reared  
431 bees (Video S2). Upon visual inspection, video clips from the regions assigned to the fast

432 locomotion state showed bees moving faster than bees than in the locomotion state. Region 24  
433 contained almost the entire t-SNE trajectory of bee #12, and appeared to be the result of  
434 idiopathic tracking errors. Bee #12 and region 24 are omitted from the rest of this analysis.  
435

### 436 **Compositional analysis of behaviors**

437 *Paired behaviors.* To characterize the effect of isolation on social behavior, we first quantified  
438 how frequently paired bees were in close proximity to each other. To do this, we divided the  
439 distribution of inter-thorax distances of paired bees by the distribution that would result from  
440 random arrangement, allowing us to examine enrichment of specific inter-thorax distances  
441 compared to random chance.  
442

443 *Defining affiliation.* To determine whether distance from a social partner impacts a bee's overall  
444 behavioral repertoire, we quantified changes in the behaviors of paired bees depending on their  
445 distance from a social partner. We calculated the Jensen-Shannon divergences (a measure of the  
446 difference between probability distributions) between limb dynamics (i.e. the average t-SNE  
447 embedded spaces of bees) at different inter-thorax distances in 0.2 cm intervals and the limb  
448 dynamics at an inter-thorax distance of 8 cm apart (representative of dynamics at 'far'  
449 distances)<sup>39</sup>. We accounted for artifacts produced by tracking errors or confined motion by  
450 eliminating data from frames in which the bees touched each other or the edge of the arena.  
451

452 *Impacts of affiliation.* To quantify differences in the behavioral profiles of bees when affiliated  
453 versus unaffiliated, we compared the log-ratios of the geometric means of each discrete behavior  
454 component to zero. To compare across conditions, we calculated the medians of the distributions  
455 of log ratios in behavior components between affiliated and unaffiliated states for each treatment  
456 group.  
457

458 *Quantification of antennation behaviors.* In order to quantify the amount of time that individuals  
459 spent contacting other bees with their antennae, we counted the number of antennal touches to  
460 different body zones of the social partner. Because different body zones (head, thorax, abdomen,  
461 body) have different amounts of available edge space for contact, we normalized the number of  
462 antennal touches to body zones of the partner bee by calculating the fraction of the total available  
463 edge of the bee each defined zone occupied.

### 464 **Tissue collection for RNAseq**

465 Bumblebees were flash frozen on dry ice and stored at -80°C until dissection. To collect the  
466 central brain, frozen bees were decapitated with dissecting scissors. With the entire head  
467 submerged in RNAlater Ice (Invitrogen, AM7030) over a bed of dry ice/ethanol, large sections of  
468 the dorsal and ventral head cuticle and mandibles were chipped away to expose neural tissues.  
469 The chipped heads were transferred to a 10x volume of RNAlater-ICE (Invitrogen AM7030)  
470 solution, submerged, and allowed to incubate at 4°C for 16 hours before subdissection of the

471 central brain over wet ice. Fat bodies, compound eyes, and ocelli were removed from the head  
472 mass. Brains were placed into individual 1.5 ml Eppendorf tubes with a 2.8mm bead (OPS  
473 Diagnostics, GBSS 089-5000-11) and homogenized for 10 minutes at maximum speed on a  
474 Qiagen TissueLyserII.

#### 475 **RNA extraction and TM3'-seq**

476 We extracted RNA from whole brain homogenates using the Dynabeads mRNA DIRECT kit  
477 (Invitrogen, 61011) according to manufacturer's protocol with homemade low-salt buffer (LSB,  
478 20mM Tris-HCl[pH 7.5], 150 mM NaCl, 1mM EDTA) and Lysis/Binding Buffer (LBB, 100mM  
479 Tris-HCl[pH 7.5], 500 mM LiCL, 10mM EDTA[pH 8], 1% LiDS, 5mM DTT). RNA quality and  
480 concentration were checked on a Tapestation in the Princeton Genomics Core before proceeding  
481 with library preparation. Samples with RNA integrity scores below 8.8 were excluded from  
482 study. We prepared TM3'-seq libraries according to published protocols<sup>44</sup> using i5 and i7  
483 primers and Tn5 generously provided by the Ayroles lab. Libraries of 43 bees were sequenced on  
484 an Illumina NovaSeq instrument (single-end, S1 100nt lane), generating ~450 million reads.  
485 Samples were demultiplexed by the Princeton Genomics Core and samples with low read counts  
486 (<1 million reads, n = 3) were excluded from study. A total of 16 isolated, 15 group-reared, and  
487 9 colony-reared bees were included for transcriptomic analyses.

#### 488 **Transcriptomic Data Preprocessing**

489 We followed the recommended pipeline for TM3'-seq data processing<sup>44</sup> (see also  
490 <https://github.com/Lufpa/TM3Seq-Pipeline>). Reads were trimmed with custom trimmers using  
491 Trimmomatic<sup>64</sup>. Reads were aligned to the reference *Bombus impatiens* genome (BIMP\_2.2,  
492 GCF\_000188095.3) using STAR<sup>65</sup>. Small reads and duplicated reads were filtered out with  
493 SAMtools<sup>66</sup>. Mapped reads were counted using featureCounts<sup>67</sup>. Aggregate data preprocessing  
494 results can be viewed in MultiQC v1.8 here:  
495 [file:///Users/zyanwang/Dropbox%20\(Princeton\)/RNAseq/multiqc\\_report\\_2.html](file:///Users/zyanwang/Dropbox%20(Princeton)/RNAseq/multiqc_report_2.html)

#### 496 **Differential gene expression analysis**

497 Analysis of differential genes was performed using the DESeq2 package<sup>68</sup> in RStudio version  
498 1.2.5001 running R version 3.6.1. The standard DESeq2 workflow was applied to the unique  
499 (deduplicated) aligned raw reads, and an additive model was built with source colony and  
500 treatment as factors. For pairwise testing of differential expression, colony-reared bees were set  
501 as the control and the false discovery rate (FDR) was set at 0.05.

#### 502 **GO Term Enrichment**

503 Gene Ontology terms were assigned to genes using Trinotate<sup>69</sup>. Gene set enrichment analysis  
504 was performed using the topGO package in R<sup>70</sup>. Only Biological Process terms were considered,



505 and a Fisher's exact test was used to perform the enrichment test using the "elim " algorithm in  
506 topGO. FDR was set at 0.05.

### 507 **Weighted gene correlation network analysis**

508 Co-expression analysis of brain RNA sequencing data from all bees was implemented with the  
509 WGCNA package in R<sup>54</sup>. Consensus correlation matrices were constructed and converted to  
510 adjacency matrices that retained information about the sign of the correlation<sup>71</sup>. Adjacency  
511 matrices were raised to a soft power threshold of 10. This was empirically determined based on a  
512 measure of R<sup>2</sup> scale-free topology model fit that maximized and plateaued over 0.8. The soft-  
513 power thresholded adjacency matrices were converted into a topological overlap matrix (TOM)  
514 and a topological dissimilarity matrix (1-TOM). We then performed agglomerative hierarchical  
515 clustering using the average linking method on the TOM dissimilarity matrix. Gene modules  
516 were defined from the resulting clustering tree, and branches were cut using the hybrid dynamic  
517 tree cutting function: the module detection sensitivity (deepSplit) was set to 2 (default),  
518 minimum module size 30 (default), and the cut height for module merging set to 0.25 (modules  
519 whose eigengenes were correlated above 0.75 were merged). This yielded 16 consensus modules  
520 (Figure 3, Figure S3), each assigned a color label. For each gene module, a summary measure  
521 (module eigengene) was computed as the first principal component of the module expression  
522 profiles. Genes that could not be clustered into any module were assigned to module M0 and not  
523 used for any downstream analysis. Correlation matrices for module eigengenes were then  
524 calculated separately for each data set (i.e. we considered RNA sequencing data from colony-  
525 and group- reared bees as the first data set, and isolated bees as the second data set) for  
526 comparison.

527 We also constructed set-specific modules in order to relate network relationships unique  
528 to each data set to the global relationships in the consensus modules. Network construction and  
529 module detection was performed as described above. We related set-specific modules to  
530 consensus modules by calculating the overlap of each pair of modules and using Fisher's exact  
531 test to assign a p-value to each of the pairwise overlaps (Figure S3).

### 532 **Whole mount dissections and tissue preparation for confocal imaging**

533 To measure neuropil volumes of bumblebees, we created a brain atlas based on confocal image  
534 stacks of the bee brain's natural autofluorescence. Bees were anesthetized with CO<sub>2</sub> and  
535 decerebrated. Mandibles were removed, then heads were placed in fresh 4% paraformaldehyde  
536 (PFA) at 4°C overnight, rocking. A top-down photograph of the bee head was taken, and head  
537 width was measured in Fiji. The brains were subdissected in cold PBS and fixed in PFA at 4°C  
538 overnight. The next day, brains were washed in fresh phosphate-buffered saline (PBS) 3 x 10  
539 min, transferred to a glass scintillation vial, and post-fixed in 2% glutaraldehyde at 4°C for 48  
540 hrs. After post-fixation, brains were washed 3 x 10 min in PBS, submerged in formamide bleach  
541 (76% PBS, 20% 30% H<sub>2</sub>O<sub>2</sub>, 1% 10% Triton-X100, 3% formamide) for 75 min at room

542 temperature, and washed again 3 x 10 min in PBS. Brains were then dehydrated in ethanol: 1 x  
543 10 min washes of 30%, 50%, 70%, 90%, and 95% EtOH, then 3 x 10 min washes of 100%  
544 EtOH. Samples were stored in 100% EtOH until clearing and imaging. Brains were cleared in  
545 methyl salicylate (Sigma Aldrich, M2047) for 30 min at room temperature, then mounted in  
546 fresh methyl salicylate on a glass slide for confocal imaging.

## 547 **Confocal imaging and brain atlas construction**

548 All imaging was performed in the Princeton Confocal Imaging Facility on a Nikon A1 laser  
549 confocal microscope and a PC machine running the Nikon Elements Software package. Samples  
550 were scanned in the 488 nm laser line. Images were optically sectioned at 2.542um until the  
551 entire brain was imaged in series at 10x magnification. Large image grab was used to image the  
552 entire field of view in 4 quadrants, then stitch quadrants together to create a single 1895 x 1895  
553 image. The following regions of the reference worker brain was manually segmented based on  
554 visible boundaries visualized with autofluorescence using a Wacom drawing tablet and the  
555 segmentation/3D reconstruction software ITK-SNAP: the central complex (including  
556 protocerebral bridge and nodules), antennal lobes, mushroom body and mushroom body lobes,  
557 and optic lobes were manually segmented. This reference brain was used as the template for  
558 downstream brain registration.

## 559 **Measuring brain volumes**

560 The elastix package<sup>72</sup> was used to register confocal images of experimental brains to the template  
561 brain. The Jacobian determinants were calculated using transformix, and after transformation,  
562 voxels corresponding to each neuropil region were summed. Voxel data was plotted in RStudio  
563 using the ggplot2 package. The Fligner-Killeen test of homogeneity of variances was used across  
564 samples (p-value < 0.05).

565

## 566 **Supplementary Figure Legends**

### 567 **Figure S1. Extended behavior analysis**

568 **A.** Watershed transform of the embedded space of body dynamics showing the 38 regions  
569 identified around separate density peaks. By visually inspecting video clips from each region, we  
570 grouped regions together based on similar stereotyped behaviors, indicated by the bold black  
571 lines. Region 24 was excluded since it contained the dynamics of a single bee. **B-D.** Probability  
572 density maps showing the distribution of timepoints from the solo trials of isolated (**B**), group-  
573 reared (**C**), and colony-reared (**D**) bees. **E-G.** Histograms showing the different thorax speed  
574 distributions of solo assayed isolated, group-, and colony-reared bees. **H.** Behavior compositions  
575 for all trial types. For mixed pairings, the treatment condition noted first is the one displayed  
576 (e.g. isoxgrp indicates data from isolated bees that have been paired with group-reared bees).

577

### 578 **Figure S2. Extended affiliation analysis**

579 **A-G.** Inter-thorax occupancy shown as enrichment over the null model of random chance for all  
580 paired trials, as labeled. Data from the homogeneous pairings are also presented in the body of

581 the paper, and are shown here for completeness. **H-I.** Behavior compositions for affiliated (**H**)  
582 and unaffiliated (**I**) bees for all paired trials. For mixed pairings, the treatment condition noted  
583 first is the one displayed (e.g. isoxgrp indicates data from isolated bees that have been paired  
584 with group-reared bees).

585  
586 **Figure S3. Weighted gene correlation network analysis.**

587 A. Consensus gene dendrogram obtained by clustering the dissimilarity of genes from all  
588 samples (Colony-, Group-, and Isolation-reared) based on consensus topological overlap (see  
589 Methods). Corresponding module colors plotted below. B. Dendrogram of consensus module  
590 eigengenes in colony- and group-reared bees. C. Dendrogram of consensus module eigengenes in  
591 isolated bees. D. Correspondence of modules built from colony- and group-reared bee data (y-  
592 axis) and consensus modules (x-axis). Numbers in the table indicate gene counts in the  
593 corresponding module. Cell color indicates  $-\log(p)$ , where  $p$  = Fisher's exact test p-value for the  
594 overlap of the two modules: the more significant the overlap, the redder the cell. E.  
595 Correspondence of modules built from isolated bee data (y-axis) and consensus modules (x-  
596 axis).

597  
598 **Figure S4. Brain voxel measurements.**

599 A. Head width of bumblebees. Variances are not significantly different from each other  
600 (Levene's test); means are not significantly different from each other (Kruskal-Wallis test). B.  
601 Total raw voxels. Variances are not significantly different from each other (Levene's test);  
602 means are not significantly different from each other (Kruskal-Wallis test). C-E. Normalized  
603 volumes of brain regions by treatment. Samples plotted by increasing total volume along the x-  
604 axis. CC: central complex, AL: antennal lobe, MB: mushroom bodies; OL: optic lobes

605  
606  
607

608 **Supplementary Items**

609

610 Video S1. SLEAP-tracked pair of bees

611

612 Video S2. Discrete behavior map examples

613

614 Video S3. Worker Bee Brain Reference Template

615

616 Table S1. Table of Differentially Expressed Genes

617

618 Table S2. Table of GOTerm Enrichment lists

619

620 Table S3. Table of WGCNA Module Membership

621

622

623 **References**

- 624 1. Boulay, R., Soroker, V., Godzkinska, E.J., Hefetz, A., and Lenoir, A. (2000). Octopamine  
625 reverses social deprivation effects. *The Journal of Experimental Biology*, 513–520.
- 626 2. Boulay, R., and Lenoir, A. (2001). Social isolation of mature workers affects nestmate  
627 recognition in the ant *Camponotus fellah*. *Behavioural Processes* 55, 67–73.
- 628 3. Koto, A., Mersch, D., Hollis, B., and Keller, L. (2015). Social isolation causes mortality by  
629 disrupting energy homeostasis in ants. *Behav Ecol Sociobiol* 69, 583–591.
- 630 4. Seid, M.A., and Junge, E. (2016). Social isolation and brain development in the ant  
631 *Camponotus floridanus*. *Sci Nat* 103, 42.
- 632 5. Gross, W.B., and Colmano, G. (1969). The Effect of Social Isolation on Resistance to Some  
633 Infectious Diseases. *Poult Sci* 48, 514–520.
- 634 6. Li, W., Wang, Z., Syed, S., Lyu, C., Lincoln, S., O’Neil, J., Nguyen, A.D., Feng, I., and  
635 Young, M.W. (2021). Chronic social isolation signals starvation and reduces sleep in  
636 *Drosophila*. *Nature* 597, 239–244.
- 637 7. Taborsky, B., and Oliveira, R. (2012). Social competence: an evolutionary approach. *Trends*  
638 *in Ecology & Evolution* 27, 679–388.
- 639 8. Taborsky, B., Arnold, C., Junker, J., and Tschopp, A. (2012). The early social environment  
640 affects social competence in a cooperative breeder. *Animal Behaviour* 83, 1067–1074.
- 641 9. Hofmann, H.A., Beery, A.K., Blumstein, D.T., Couzin, I.D., Earley, R.L., Hayes, L.D., Hurd,  
642 P.L., Lacey, E.A., Phelps, S.M., Solomon, N.G., et al. (2014). An evolutionary framework for  
643 studying mechanisms of social behavior. *Trends in Ecology & Evolution* 29, 581–589.
- 644 10. Bailey, N.W., and Moore, A.J. (2018). Evolutionary Consequences of Social Isolation.  
645 *Trends in Ecology & Evolution* 33, 595–607.
- 646 11. Matsumoto, K., Pinna, G., Puia, G., Guidotti, A., and Costa, E. (2005). Social isolation  
647 stress-induced aggression in mice: A model to study the pharmacology of  
648 neurosteroidogenesis. *Stress* 8, 85–93.
- 649 12. Agís-Balboa, R.C., Pinna, G., Pibiri, F., Kadriu, B., Costa, E., and Guidotti, A. (2007). Down-  
650 regulation of neurosteroid biosynthesis in corticolimbic circuits mediates social isolation-  
651 induced behavior in mice. *PNAS* 104, 18736–18741.
- 652 13. Gómez-Laplaza, L.M., and Morgan, E. (2000). Laboratory studies of the effects of short-  
653 term isolation on aggressive behaviour in fish. *Marine and Freshwater Behaviour and*  
654 *Physiology* 33, 63–102.
- 655 14. Agrawal, P., Kao, D., Chung, P., and Looger, L.L. (2020). The neuropeptide Drosulfakinin  
656 regulates social isolation-induced aggression in *Drosophila*. *Journal of Experimental Biology*  
657 129, 549–563.



- 658 15. Johnson, O., Becnel, J., and Nichols, C.D. (2009). Serotonin 5-HT<sub>2</sub> and 5-HT<sub>1A</sub>-like  
659 receptors differentially modulate aggressive behaviors in *Drosophila melanogaster*.  
660 *Neuroscience* 158, 1292–1300.
- 661 16. Zhou, C., Rao, Y., and Rao, Y. (2008). A subset of octopaminergic neurons are important  
662 for *Drosophila* aggression. *Nat Neurosci* 11, 1059–1067.
- 663 17. Adamo, S.A., and Hoy, R.R. (1995). Agonistic behaviour in male and female field crickets,  
664 *Gryllus bimaculatus*, and how behavioural context influences its expression. *Animal*  
665 *Behaviour* 49, 1491–1501.
- 666 18. Kuriwada, T. (2016). Social isolation increases male aggression toward females in the field  
667 cricket *Gryllus bimaculatus*. *Population Ecology* 58, 147–153.
- 668 19. Wilson, Edward O. (1971). *The Insect Societies* (Belknap Press).
- 669 20. Hewlett, S.E., Wareham, D.M., and Barron, A.B. (2018). Honey bee (*Apis mellifera*)  
670 sociability and nestmate affiliation are dependent on the social environment experienced  
671 post-eclosion. *J Exp Biol* 221, jeb173054.
- 672 21. Maleszka, J., Barron, A.B., Helliwell, P.G., and Maleszka, R. (2009). Effect of age,  
673 behaviour and social environment on honey bee brain plasticity. *J Comp Physiol A* 195,  
674 733–740.
- 675 22. Breed, M.D., Silverman, J.M., and Bell, W.J. (1978). Agonistic behavior, social interactions,  
676 and behavioral specialization in a primitively eusocial bee. *Ins. Soc* 25, 351–364.
- 677 23. Boulay, R., Quagebeur, M., Godzinska, E.J., and Lenoir, A. (1999). Social isolation in ants:  
678 Evidence of its impact on survivorship and behavior in *Camponotus fellah*. *Sociobiology* 33,  
679 111–124.
- 680 24. Manfredini, F., Martinez-Ruiz, C., Wurm, Y., Shoemaker, D.W., and Brown, M.J.F. (2021).  
681 Social isolation and group size are associated with divergent gene expression in the brain of  
682 ant queens. *Genes, Brain and Behavior*, e12758.
- 683 25. Jernigan, C.M., Zaba, N.C., and Sheehan, M.J. (2021). Age and social experience induced  
684 plasticity across brain regions of the paper wasp *Polistes fuscatus*. *Biol. Lett.* 17,  
685 rsbl.2021.0073, 20210073.
- 686 26. Tibbetts, E.A., Desjardins, E., Kou, N., and Wellman, L. (2019). Social isolation prevents the  
687 development of individual face recognition in paper wasps. *Animal Behaviour* 152, 71–77.
- 688 27. Uy, F.M.K., Jernigan, C.M., Zaba, N.C., Mehrotra, E., Miller, S.E., and Sheehan, M.J.  
689 (2021). Dynamic neurogenomic responses to social interactions and dominance outcomes  
690 in female paper wasps. *bioRxiv*, 26.
- 691 28. Goulson, D. (2010). *Bumblebees: Behaviour, Ecology, and Conservation* (OUP Oxford).
- 692 29. Jandt, J.M., and Dornhaus, A. (2009). Spatial organization and division of labour in the  
693 bumblebee *Bombus impatiens*. *Animal Behaviour* 77, 641–651.

- 694 30. Jandt, J.M., and Dornhaus, A. (2011). Competition and cooperation: bumblebee spatial  
695 organization and division of labor may affect worker reproduction late in life. *Behav Ecol*  
696 *Sociobiol* 65, 2341–2349.
- 697 31. Jandt, J.M., Huang, E., and Dornhaus, A. (2009). Weak specialization of workers inside a  
698 bumble bee (*Bombus impatiens*) nest. *Behav Ecol Sociobiol* 63, 1829–1836.
- 699 32. Crall, J.D., Switzer, C.M., Oppenheimer, R.L., Ford Versypt, A.N., Dey, B., Brown, A.,  
700 Eyster, M., Guérin, C., Pierce, N.E., Combes, S.A., et al. (2018). Neonicotinoid exposure  
701 disrupts bumblebee nest behavior, social networks, and thermoregulation. *Science* 362,  
702 683–686.
- 703 33. Jones, B.M., Leonard, A.S., Papaj, D.R., and Gronenberg, W. (2013). Plasticity of the  
704 Worker Bumblebee Brain in Relation to Age and Rearing Environment. *BBE* 82, 250–261.
- 705 34. Skorupski, P., and Chittka, L. (2010). Photoreceptor Spectral Sensitivity in the Bumblebee,  
706 *Bombus impatiens* (Hymenoptera: Apidae). *PLoS ONE* 5, e12049.
- 707 35. Berman, G.J., Choi, D.M., Bialek, W., and Shaevitz, J.W. (2014). Mapping the stereotyped  
708 behaviour of freely moving fruit flies. *J. R. Soc. Interface* 11, 20140672.
- 709 36. Pereira, T.D., Tabris, N., Li, J., Ravindranath, S., Papadoyannis, E.S., Wang, Z.Y., Turner,  
710 D.M., McKenzie-Smith, G., Kocher, S.D., Falkner, A.L., et al. (2020). SLEAP: Multi-animal  
711 pose tracking. *bioRxiv*, 2020.08.31.276246.
- 712 37. Martín-Fernández, J.-A., Daunis-i-Estadella, J., and Mateu-Figueras, G. (2015). On the  
713 interpretation of differences between groups for compositional data. *Statistics and*  
714 *Operations Research Transactions* 39, 231–252.
- 715 38. Jiang, L., Cheng, Y., Gao, S., Zhong, Y., Ma, C., Wang, T., and Zhu, Y. (2020). Emergence  
716 of social cluster by collective pairwise encounters in *Drosophila*. *eLife* 9, e51921.
- 717 39. Klibaite, U., Berman, G.J., Cande, J., Stern, D.L., and Shaevitz, J.W. (2017). An  
718 unsupervised method for quantifying the behavior of paired animals. *Phys. Biol.* 14, 015006.
- 719 40. Derstine, N.T., Villar, G., Orlova, M., Hefetz, A., Millar, J., and Amsalem, E. (2021). Dufour's  
720 gland analysis reveals caste and physiology specific signals in *Bombus impatiens*. *Sci Rep*  
721 11, 2821.
- 722 41. Ayasse, M., and Jarau, S. (2014). Chemical Ecology of Bumble Bees. *Annual Review of*  
723 *Entomology* 59, 299–319.
- 724 42. Wang, Q., Goodger, J.Q.D., Woodrow, I.E., and Elgar, M.A. (2016). Location-specific  
725 cuticular hydrocarbon signals in a social insect. *Proceedings of the Royal Society B:*  
726 *Biological Sciences* 283, 20160310.
- 727 43. Wang, Q., Goodger, J.Q.D., Woodrow, I.E., Chang, L., and Elgar, M.A. (2019). Task-  
728 Specific Recognition Signals Are Located on the Legs in a Social Insect. *Frontiers in*  
729 *Ecology and Evolution* 7, 227.

- 730 44. Pallares, L.F., Picard, S., and Ayroles, J.F. (2019). TM3'seq: A Tagmentation-Mediated 3'  
731 Sequencing Approach for Improving Scalability of RNAseq Experiments. *G3*,  
732 g3.400821.2019.
- 733 45. Jaycox, E.R., Skowronek, W., and Guynn, G. (1974). Behavioral Changes in Worker Honey  
734 Bees (*Apis mellifera*) Induced by Injections of a Juvenile Hormone Mimic<sup>1</sup>. *Annals of the*  
735 *Entomological Society of America* 67, 529–534.
- 736 46. Robinson, G.E. (1987). Regulation of honey bee age polyethism by juvenile hormone.  
737 *Behav Ecol Sociobiol* 20, 329–338.
- 738 47. Pandey, A., Motro, U., and Bloch, G. (2020). Juvenile hormone interacts with multiple  
739 factors to modulate aggression and dominance in groups of orphan bumble bee (*Bombus*  
740 *terrestris*) workers. *Hormones and Behavior* 117, 104602.
- 741 48. Jindra, M., Bellés, X., and Shinoda, T. (2015). Molecular basis of juvenile hormone  
742 signaling. *Current Opinion in Insect Science* 11, 39–46.
- 743 49. Jindra, M., Palli, S.R., and Riddiford, L.M. (2013). The Juvenile Hormone Signaling Pathway  
744 in Insect Development. *Annual Review of Entomology* 58, 181–204.
- 745 50. Shpigler, H., Amsalem, E., Huang, Z.Y., Cohen, M., Siegel, A.J., Hefetz, A., and Bloch, G.  
746 (2014). Gonadotropic and Physiological Functions of Juvenile Hormone in Bumblebee  
747 (*Bombus terrestris*) Workers. *PLoS ONE* 9, e100650.
- 748 51. He, Q., Wen, D., Jia, Q., Cui, C., Wang, J., Palli, S.R., and Li, S. (2014). Heat Shock Protein  
749 83 (Hsp83) Facilitates Methoprene-tolerant (Met) Nuclear Import to Modulate Juvenile  
750 Hormone Signaling. *Journal of Biological Chemistry* 289, 27874–27885.
- 751 52. Saul, M.C., Blatti, C., Yang, W., Bukhari, S.A., Shpigler, H.Y., Troy, J.M., Seward, C.H.,  
752 Sloofman, L., Chandrasekaran, S., Bell, A.M., et al. (2019). Cross-species systems analysis  
753 of evolutionary toolkits of neurogenomic response to social challenge. *Genes, Brain and*  
754 *Behavior* 18, e12502.
- 755 53. Jones, B.M., Rubin, B.E.R., Dudchenko, O., Kapheim, K.M., Wyman, E.S., Hilaire, B.G.St.,  
756 Liu, W., Parsons, L.R., Jackson, S.R., Goodwin, K., et al. (2021). Convergent selection on  
757 juvenile hormone signaling is associated with the evolution of eusociality in bees. *bioRxiv*.
- 758 54. Langfelder, P., and Horvath, S. (2008). WGCNA: an R package for weighted correlation  
759 network analysis. *BMC Bioinformatics* 9, 559.
- 760 55. Gupta, S., Ellis, S.E., Ashar, F.N., Moes, A., Bader, J.S., Zhan, J., West, A.B., and Arking,  
761 D.E. (2014). Transcriptome analysis reveals dysregulation of innate immune response  
762 genes and neuronal activity-dependent genes in autism. *Nat Commun* 5, 5748.
- 763 56. Gordon, A., Forsingdal, A., Klewe, I.V., Nielsen, J., Didriksen, M., Werge, T., and  
764 Geschwind, D.H. (2021). Transcriptomic networks implicate neuronal energetic  
765 abnormalities in three mouse models harboring autism and schizophrenia-associated  
766 mutations. *Mol Psychiatry* 26, 1520–1534.

- 767 57. Lombardo, M.V., Courchesne, E., Lewis, N.E., and Pramparo, T. (2017). Hierarchical  
768 cortical transcriptome disorganization in autism. *Molecular Autism* 8, 29.
- 769 58. Shpigler, H., Tamarkin, M., Gruber, Y., Poleg, M., Siegel, A.J., and Bloch, G. (2013). Social  
770 influences on body size and developmental time in the bumblebee *Bombus terrestris*. *Behav*  
771 *Ecol Sociobiol* 67, 1601–1612.
- 772 59. Sibbald, E.D., and Plowright, C.M.S. (2014). Social interactions and their connection to  
773 aggression and ovarian development in orphaned worker bumblebees (*Bombus impatiens*).  
774 *Behavioural Processes* 103, 150–155.
- 775 60. Smith, D.B., Arce, A.N., Ramos Rodrigues, A., Bischoff, P.H., Burris, D., Ahmed, F., and  
776 Gill, R.J. (2020). Insecticide exposure during brood or early-adult development reduces  
777 brain growth and impairs adult learning in bumblebees. *Proceedings of the Royal Society B:*  
778 *Biological Sciences* 287, 20192442.
- 779 61. Waddington, C.H. (1942). Canalization of Development and the Inheritance of Acquired  
780 Characters. *Nature* 150, 563–565.
- 781 62. Siegal, M.L., and Bergman, A. (2002). Waddington's canalization revisited: Developmental  
782 stability and evolution. *Proceedings of the National Academy of Sciences* 99, 10528–10532.
- 783 63. McGrath, J.J., Hannan, A.J., and Gibson, G. (2011). Decanalization, brain development and  
784 risk of schizophrenia. *Translational Psychiatry* 1, e14.
- 785 64. Bolger, A.M., Lohse, M., and Usadel, B. (2014). Trimmomatic: a flexible trimmer for Illumina  
786 sequence data. *Bioinformatics* 30, 2114–2120.
- 787 65. Dobin, A., Davis, C.A., Schlesinger, F., Drenkow, J., Zaleski, C., Jha, S., Batut, P.,  
788 Chaisson, M., and Gingeras, T.R. (2013). STAR: ultrafast universal RNA-seq aligner.  
789 *Bioinformatics* 29, 15–21.
- 790 66. Li, H., Handsaker, B., Wysoker, A., Fennell, T., Ruan, J., Homer, N., Marth, G., Abecasis,  
791 G., Durbin, R., and 1000 Genome Project Data Processing Subgroup (2009). The  
792 Sequence Alignment/Map format and SAMtools. *Bioinformatics* 25, 2078–2079.
- 793 67. Liao, Y., Smyth, G.K., and Shi, W. (2014). featureCounts: an efficient general purpose  
794 program for assigning sequence reads to genomic features. *Bioinformatics* 30, 923–930.
- 795 68. Love, M.I., Huber, W., and Anders, S. (2014). Moderated estimation of fold change and  
796 dispersion for RNA-seq data with DESeq2. *Genome Biology* 15, 550.
- 797 69. Grabherr, M.G., Haas, B.J., Yassour, M., Levin, J.Z., Thompson, D.A., Amit, I., Adiconis, X.,  
798 Fan, L., Raychowdhury, R., Zeng, Q., et al. (2011). Full-length transcriptome assembly from  
799 RNA-Seq data without a reference genome. *Nat Biotechnol* 29, 644–652.
- 800 70. Alexa, A., and Rahnenfuhrer, J. Gene set enrichment analysis with topGO. 26.
- 801 71. Langfelder, P., and Horvath, S. (2007). Eigengene networks for studying the relationships  
802 between co-expression modules. *BMC Systems Biology* 1, 54.

803 72. Klein, S., Staring, M., Murphy, K., Viergever, M.A., and Pluim, J. (2010). elastix: A Toolbox  
804 for Intensity-Based Medical Image Registration. *IEEE Trans. Med. Imaging* 29, 196–205.

805
